# Supplementary material for: Diffusion Tensor Imaging in NAWM and NADGM in MS and CIS: Association with Candidate Biomarkers in Sera
Source: Hindawi journal article supplement (doi:10.1155/2013/265259), 2013-01-01
Supplement: f1 [file 265259.f1.pdf]

**Supplementary table 1.** The levels (pg/ml) of soluble molecules in different subtypes of MS and controls (median (25-75<sup>th</sup> percentiles))

| <b>Molecule</b>                 | <b>RRMS<br/>n=33</b>                | <b>SPMS<br/>n=18</b>   | <b>PPMS<br/>n=20</b>                  | <b>CIS<br/>n=15</b>                 | <b>Controls<br/>n=21</b>            |
|---------------------------------|-------------------------------------|------------------------|---------------------------------------|-------------------------------------|-------------------------------------|
| <b>MIF</b>                      | 138.2 (50.0-229.4) <sup>A,C</sup>   | 225.8 (134.0-317.3)    | 290.7 (189.3-449.3) <sup>C</sup>      | 167.3 (97.8-268.2)                  | 378.5 (236.4-535.9) <sup>A</sup>    |
| <b>sFas</b>                     | 4612.8 (4058.0-5940.7) <sup>C</sup> | 5572.4 (4388.3-6845.4) | 6787.6 (5393.9-7709.2) <sup>B,C</sup> | 4318.8 (3320.0-5697.9) <sup>G</sup> | 4824.9 (3405.1-5638.1) <sup>B</sup> |
| <b>sFasL</b>                    | 90.6 (58.1-161.6)                   | 96.2 (72.8-153.6)      | 111.2 (71.5-191.9)                    | 83.6(67.1-174.6)                    | 80.4 (56.6-129.1)                   |
| <b>sTRAIL</b>                   | 765.9 (577.2-1728.9)                | 785.5 (587.2-1106.0)   | 1032.0 (762.8-2036.1)                 | 902.3(593.3-1170.5)                 | 738.7 (523.2-2260.8)                |
| <b>sTNF-<math>\alpha</math></b> | 4.5 (3.4-6.5) <sup>C</sup>          | 4.1 (3.3-5.8)          | 6.4 (4.4-8.9) <sup>B,C</sup>          | 4.6 (3.5-6.6)                       | 3.7 (2.4-4.6) <sup>B</sup>          |
| <b>IFN-<math>\gamma</math></b>  | 0.3 (0.3-3.0)                       | 1.5 (0.3-4.1)          | 0.6 (0.3-3.3)                         | 2.8 (0.3-25.5)                      | 0.5 (0.3-7.5)                       |
| <b>IL-2</b>                     | 1.2 (0.2-3.6)                       | 0.6 (0.2-5.2)          | 0.4 (0.2-2.4)                         | 1.5 (0.5-6.2)                       | 2.1 (0.2-6.1)                       |
| <b>IL-6</b>                     | 4.9 (2.0-21.5)                      | 7.1 (3.2-13.0)         | 8.8 (1.6-26.7)                        | 3.6 (1.4-17.9)                      | 4.1 (2.0-9.3)                       |
| <b>IL-10</b>                    | 2.9 (0.6-5.7)                       | 3.4 (1.8-7.7)          | 3.6 (2.2-9.2)                         | 4.8 (1.2-25.9)                      | 2.3 (0.2-6.0)                       |
| <b>IL-12p70</b>                 | 0.4 (0.1-1.4)                       | 1.3 (0.4-5.4)          | 0.8 (0.1-4.5)                         | 1.7 (0.3-9.1)                       | 1.6 (0.1-7.9)                       |
| <b>CXCL10</b>                   | 95.7 (68.1-155.6)                   | 90.5 (62.8-152.6)      | 106.9 (74.7-212.9)                    | 65.9 (53.6-178.2)                   | 106.9 (55.1-130.7)                  |
| <b>CCL2</b>                     | 177.0 (140.4-271.8)                 | 218.8 (157.0-331.0)    | 288.4 (201.3-461.6) <sup>B</sup>      | 248.3 (165.7-332.0)                 | 152.8 (122.6-273.1) <sup>B</sup>    |
| <b>CCL3</b>                     | 37.3 (21.6-96.3)                    | 55.7 (19.2-121.4)      | 45.4 (27.0-164.7)                     | 72.6 (32.0-186.1)                   | 51.4 (27.7-122.8)                   |
| <b>CCL4</b>                     | 126.6 (20.4-668.0)                  | 140.2 (17.0-873.8)     | 290.7 (39.8-1054.6)                   | 365.1 (144.0-1188.5)                | 289.1 (16.8-725.0)                  |

RRMS, relapsing remitting MS; SPMS, secondary progressive MS; PPMS, Primary progressive MS; CIS, clinically isolated syndrome. Analyses were performed for all four subtypes versus control, as well as between the subtypes. The results from the Mann-Whitney U Test are shown as the Bonferroni-corrected p-values (p<0.05).

A Comparison between the RRMS and HC groups

B Comparison between the PPMS and HC groups

C Comparison between the PPMS and RRMS groups

**Supplementary table 2.** Clinical characteristics of patients and controls included in serum analyses.

|                                           | RRMS<br>n=33          | SPMS<br>n=18           | PPMS<br>n=20           | CIS<br>n=15          | HC<br>n=21 |
|-------------------------------------------|-----------------------|------------------------|------------------------|----------------------|------------|
| Sex (M/F) <sup>a</sup>                    | 10/23                 | 6/12                   | 9/11                   | 2/13                 | 8/13       |
| Age (years) <sup>b</sup>                  | 37.0±8.6<br>(18-53)   | 49.5±8.2<br>(35-61)    | 56.9±9.2<br>(38-73)    | 35.3±9.5<br>(20-52)  |            |
| Duration of disease (years) <sup>b</sup>  | 4.1±4.0<br>(0.0-12.3) | 11.6±9.5<br>(0.2-31.2) | 12.0±8.6<br>(0.2-26.2) | NA                   |            |
| EDSS <sup>b</sup>                         | 1.6±1.5<br>(0-6.0)    | 4.8±1.7<br>(2.0-7.0)   | 4.7±1.9<br>(1.0-7.5)   | 0.1±0.3<br>(0.0-1.0) |            |
| Number of relapses/ 2years <sup>b,c</sup> | 1.6±1.4<br>(0-5)      | 0.2±0.5<br>(0-2)       | NA                     | 0.8±0.6<br>(0-2)     |            |
| Treatment (NT/IFN/GA) <sup>a</sup>        | 12/18/3               | 17/1/0                 | 20/0/0                 | 15/0/0               |            |

MS, multiple sclerosis; CIS, clinically isolated syndrome; RRMS, relapsing-remitting MS; SPMS, secondary progressive MS; PPMS, primary progressive MS; HC, healthy controls; EDSS, expanded disability status scale; NT, no treatment; IFN, interferon- $\beta$ ; GA, glatiramer acetate.

<sup>a</sup> Number of patients.

<sup>b</sup> Mean  $\pm$  SD (range).

<sup>c</sup> Number of relapses in the two years before study entry
